# Supplementary material for: Limited Impact of Delta Variant’s Mutations on the Effectiveness of Neutralization Conferred by Natural Infection or COVID-19 Vaccines in a Latino Population
Source: MDPI journal article supplement (doi:10.3390/v13122405), 2021-11-30
Supplement: s1 [file s1]

Supplementary Table S2. Time Between Diagnosis and Vaccines for Pre-exposed Individuals

| ID             | Time (days) between Dx and first vaccine dose | Months     |
|----------------|-----------------------------------------------|------------|
| 384            | 111                                           | 3.7        |
| 367.7          | 90                                            | 3.0        |
| 218            | 85                                            | 2.8        |
| 376            | 176                                           | 5.9        |
| 313            | 169                                           | 5.6        |
| 382            | 148                                           | 4.9        |
| 511            | 67                                            | 2.2        |
| 512            | 67                                            | 2.2        |
| 294            | 201                                           | 6.7        |
| 297            | 310                                           | 10.3       |
| <b>Average</b> | <b>142.4</b>                                  | <b>4.7</b> |

Dx= Diagnosis
