# Supplementary material for: Limited Impact of Delta Variant’s Mutations on the Effectiveness of Neutralization Conferred by Natural Infection or COVID-19 Vaccines in a Latino Population
Source: MDPI journal article supplement (doi:10.3390/v13122405), 2021-11-30
Supplement: s1 [file s1]

Supplementary Table S1. Time Between Sample and Vaccination of Healthy and Naturally-Infected Volunteers

| HEALTHY VACCINATED VOLUNTEERS            |             |                                                 |                                                  |                                         |
|------------------------------------------|-------------|-------------------------------------------------|--------------------------------------------------|-----------------------------------------|
| Numeric ID                               | Timepoint   | Time Between First Dose and 1st Sample Post Vac | Time Between Second Dose and Sample Post 2nd Vac | Time Between First Dose and Last Sample |
| 479                                      | Baseline    |                                                 |                                                  |                                         |
| 479.2                                    | First Dose  |                                                 |                                                  |                                         |
| 479.2                                    | Sample P1V  | 26                                              | 16                                               | 43                                      |
| 479.3                                    | Second Dose |                                                 |                                                  |                                         |
| 479.3                                    | Sample P2V  |                                                 |                                                  |                                         |
| 112                                      | Baseline    |                                                 |                                                  |                                         |
| 112.2                                    | First Dose  |                                                 |                                                  |                                         |
| 112.2                                    | Sample P1V  | 21                                              | 14                                               | 42                                      |
| 112.3                                    | Second Dose |                                                 |                                                  |                                         |
| 112.3                                    | Sample P2V  |                                                 |                                                  |                                         |
| 2                                        | Baseline    |                                                 |                                                  |                                         |
| 2.2                                      | First Dose  |                                                 |                                                  |                                         |
| 2.2                                      | Sample P1V  | 13                                              | 15                                               | 36                                      |
| 2.3                                      | Second Dose |                                                 |                                                  |                                         |
| 2.3                                      | Sample P2V  |                                                 |                                                  |                                         |
| 3                                        | Baseline    |                                                 |                                                  |                                         |
| 3.2                                      | First Dose  |                                                 |                                                  |                                         |
| 3.2                                      | Sample P1V  | 13                                              | 15                                               | 36                                      |
| 3.3                                      | Second Dose |                                                 |                                                  |                                         |
| 3.3                                      | Sample P2V  |                                                 |                                                  |                                         |
| 243                                      | Baseline    |                                                 |                                                  |                                         |
| 243.2                                    | First Dose  |                                                 |                                                  |                                         |
| 243.2                                    | Sample P1V  | 15                                              | 15                                               | 36                                      |
| 243.3                                    | Second Dose |                                                 |                                                  |                                         |
| 243.3                                    | Sample P2V  |                                                 |                                                  |                                         |
| 258                                      | Baseline    |                                                 |                                                  |                                         |
| 258.2                                    | First Dose  |                                                 |                                                  |                                         |
| 258.2                                    | Sample P1V  | 18                                              | 22                                               | 43                                      |
| 258.3                                    | Second Dose |                                                 |                                                  |                                         |
| 258.3                                    | Sample P2V  |                                                 |                                                  |                                         |
| 119                                      | Baseline    |                                                 |                                                  |                                         |
| 119.2                                    | First Dose  |                                                 |                                                  |                                         |
| 119.2                                    | Sample P1V  | 18                                              | 18                                               | 39                                      |
| 119.3                                    | Second Dose |                                                 |                                                  |                                         |
| 119.3                                    | Sample P2V  |                                                 |                                                  |                                         |
| 190                                      | Baseline    |                                                 |                                                  |                                         |
| 190.2                                    | First Dose  |                                                 |                                                  |                                         |
| 190.2                                    | Sample P1V  | 12                                              | 23                                               | 44                                      |
| 190.3                                    | Second Dose |                                                 |                                                  |                                         |
| 190.3                                    | Sample P2V  |                                                 |                                                  |                                         |
| 453                                      | Baseline    |                                                 |                                                  |                                         |
| 453.2                                    | First Dose  |                                                 |                                                  |                                         |
| 453.2                                    | Sample P1V  | 23                                              | 19                                               | 42                                      |
| 453.3                                    | Second Dose |                                                 |                                                  |                                         |
| 453.3                                    | Sample P2V  |                                                 |                                                  |                                         |
| 6                                        | Baseline    |                                                 |                                                  |                                         |
| 6.2                                      | First Dose  |                                                 |                                                  |                                         |
| 6.2                                      | Sample P1V  | 16                                              | 14                                               | 35                                      |
| 6.3                                      | Second Dose |                                                 |                                                  |                                         |
| 6.3                                      | Sample P2V  |                                                 |                                                  |                                         |
| 383                                      | Baseline    |                                                 |                                                  |                                         |
| 383.2                                    | First Dose  |                                                 |                                                  |                                         |
| 383.2                                    | Sample P1V  | 23                                              | 17                                               | 40                                      |
| 383.3                                    | Second Dose |                                                 |                                                  |                                         |
| 383.3                                    | Sample P2V  |                                                 |                                                  |                                         |
| 450                                      | Baseline    |                                                 |                                                  |                                         |
| 450.2                                    | First Dose  |                                                 |                                                  |                                         |
| 450.2                                    | Sample P1V  | 21                                              | 19                                               | 40                                      |
| 450.3                                    | Second Dose |                                                 |                                                  |                                         |
| 450.3                                    | Sample P2V  |                                                 |                                                  |                                         |
| 110                                      | Baseline    |                                                 |                                                  |                                         |
| 110.2                                    | First Dose  |                                                 |                                                  |                                         |
| 110.2                                    | Sample P1V  | 21                                              | 19                                               | 40                                      |
| 110.3                                    | Second Dose |                                                 |                                                  |                                         |
| 110.3                                    | Sample P2V  |                                                 |                                                  |                                         |
| 480                                      | Baseline    |                                                 |                                                  |                                         |
| 480.2                                    | First Dose  |                                                 |                                                  |                                         |
| 480.2                                    | Sample P1V  | 21                                              | 19                                               | 40                                      |
| 480.3                                    | Second Dose |                                                 |                                                  |                                         |
| 480.3                                    | Sample P2V  |                                                 |                                                  |                                         |
| 10                                       | Baseline    |                                                 |                                                  |                                         |
| 10.2                                     | First Dose  |                                                 |                                                  |                                         |
| 10.2                                     | Sample P1V  | 14                                              | 7                                                | 28                                      |
| 10.3                                     | Second Dose |                                                 |                                                  |                                         |
| 10.3                                     | Sample P2V  |                                                 |                                                  |                                         |
| 116                                      | Baseline    |                                                 |                                                  |                                         |
| 116.2                                    | First Dose  |                                                 |                                                  |                                         |
| 116.2                                    | Sample P1V  | 14                                              | 7                                                | 28                                      |
| 116.3                                    | Second Dose |                                                 |                                                  |                                         |
| 116.3                                    | Sample P2V  |                                                 |                                                  |                                         |
| 380                                      | Baseline    |                                                 |                                                  |                                         |
| 380.2                                    | First Dose  |                                                 |                                                  |                                         |
| 380.2                                    | Sample P1V  | 14                                              | 7                                                | 28                                      |
| 380.3                                    | Second Dose |                                                 |                                                  |                                         |
| 380.3                                    | Sample P2V  |                                                 |                                                  |                                         |
| 8                                        | Baseline    |                                                 |                                                  |                                         |
| 8.2                                      | First Dose  |                                                 |                                                  |                                         |
| 8.2                                      | Sample P1V  | 14                                              | 7                                                | 28                                      |
| 8.3                                      | Second Dose |                                                 |                                                  |                                         |
| 8.3                                      | Sample P2V  |                                                 |                                                  |                                         |
| 117                                      | Baseline    |                                                 |                                                  |                                         |
| 117.2                                    | First Dose  |                                                 |                                                  |                                         |
| 117.2                                    | Sample P1V  | 12                                              | 6                                                | 27                                      |
| 117.3                                    | Second Dose |                                                 |                                                  |                                         |
| 117.3                                    | Sample P2V  |                                                 |                                                  |                                         |
| 254                                      | Baseline    |                                                 |                                                  |                                         |
| 254.2                                    | First Dose  |                                                 |                                                  |                                         |
| 254.2                                    | Sample P1V  | 12                                              | 10                                               | 31                                      |
| 254.3                                    | Second Dose |                                                 |                                                  |                                         |
| 254.3                                    | Sample P2V  |                                                 |                                                  |                                         |
| 513                                      | Baseline    |                                                 |                                                  |                                         |
| 513.2                                    | First Dose  |                                                 |                                                  |                                         |
| 513.2                                    | Sample P1V  | 19                                              | 7                                                | 35                                      |
| 513.3                                    | Second Dose |                                                 |                                                  |                                         |
| 513.3                                    | Sample P2V  |                                                 |                                                  |                                         |
| AVERAGE Days                             |             | 17.1                                            | 14.1                                             | 36.2                                    |
| Naturally-Infected Vaccinated Volunteers |             |                                                 |                                                  |                                         |
| Numeric ID                               | Timepoint   | Time Between First Dose and 1st Sample Post Vac | Time Between Second Dose and Sample Post 2nd Vac | Time Between First Dose and Last Sample |
| 384.2                                    | Baseline    |                                                 |                                                  |                                         |
| 384.2                                    | First Dose  |                                                 |                                                  |                                         |
| 384.3                                    | Sample P1V  | 16                                              | 23                                               | 44                                      |
| 384.4                                    | Second Dose |                                                 |                                                  |                                         |
| 384.4                                    | Sample P2V  |                                                 |                                                  |                                         |
| 367.2                                    | Baseline    |                                                 |                                                  |                                         |
| 367.2                                    | First Dose  |                                                 |                                                  |                                         |
| 367.3                                    | Sample P1V  | 14                                              | 20                                               | 48                                      |
| 367.4                                    | Second Dose |                                                 |                                                  |                                         |
| 367.4                                    | Sample P2V  |                                                 |                                                  |                                         |
| 218                                      | Baseline    |                                                 |                                                  |                                         |
| 218.3                                    | First Dose  |                                                 |                                                  |                                         |
| 218.3                                    | Sample P1V  | 28                                              | 21                                               | 49                                      |
| 218.4                                    | Second Dose |                                                 |                                                  |                                         |
| 218.4                                    | Sample P2V  |                                                 |                                                  |                                         |
| 376.2                                    | Baseline    |                                                 |                                                  |                                         |
| 376.2                                    | First Dose  |                                                 |                                                  |                                         |
| 376.3                                    | Sample P1V  | 19                                              | 21                                               | 49                                      |
| 376.4                                    | Second Dose |                                                 |                                                  |                                         |
| 376.4                                    | Sample P2V  |                                                 |                                                  |                                         |
| 313.3                                    | Baseline    |                                                 |                                                  |                                         |
| 313.3                                    | First Dose  |                                                 |                                                  |                                         |
| 313.4                                    | Sample P1V  | 17                                              | 16                                               | 37                                      |
| 313.5                                    | Second Dose |                                                 |                                                  |                                         |
| 313.5                                    | Sample P2V  |                                                 |                                                  |                                         |
| 382.3                                    | Baseline    |                                                 |                                                  |                                         |
| 382.3                                    | First Dose  |                                                 |                                                  |                                         |
| 382.4                                    | Sample P1V  | 12                                              | 19                                               | 40                                      |
| 382.5                                    | Second Dose |                                                 |                                                  |                                         |
| 382.5                                    | Sample P2V  |                                                 |                                                  |                                         |
| 511                                      | Baseline    |                                                 |                                                  |                                         |
| 511.2                                    | First Dose  |                                                 |                                                  |                                         |
| 511.2                                    | Sample P1V  | 19                                              | 26                                               | 47                                      |
| 511.3                                    | Second Dose |                                                 |                                                  |                                         |
| 511.3                                    | Sample P2V  |                                                 |                                                  |                                         |
| 512                                      | Baseline    |                                                 |                                                  |                                         |
| 512.2                                    | First Dose  |                                                 |                                                  |                                         |
| 512.2                                    | Sample P1V  | 19                                              | 26                                               | 47                                      |
| 512.3                                    | Second Dose |                                                 |                                                  |                                         |
| 512.3                                    | Sample P2V  |                                                 |                                                  |                                         |
| 294.2                                    | Baseline    |                                                 |                                                  |                                         |
| 294.2                                    | First Dose  |                                                 |                                                  |                                         |
| 294.3                                    | Sample P1V  | 26                                              | 32                                               | 60                                      |
| 294.4                                    | Second Dose |                                                 |                                                  |                                         |
| 294.4                                    | Sample P2V  |                                                 |                                                  |                                         |
| 297                                      | Baseline    |                                                 |                                                  |                                         |
| 297.2                                    | First Dose  |                                                 |                                                  |                                         |
| 297.2                                    | Sample P1V  | 19                                              | 17                                               | 45                                      |
| 297.3                                    | Second Dose |                                                 |                                                  |                                         |
| 297.3                                    | Sample P2V  |                                                 |                                                  |                                         |
| AVERAGE Days                             |             | 18.9                                            | 22.1                                             | 46.6                                    |
