# Supplementary material for: Limited Impact of Delta Variant’s Mutations on the Effectiveness of Neutralization Conferred by Natural Infection or COVID-19 Vaccines in a Latino Population
Source: MDPI journal article supplement (doi:10.3390/v13122405), 2021-11-30
Supplement: s1 [file s1]

Supplementary Table S3. Neutralization Data Against SARS-CoV-2 and Variants for Pre-exposed Individuals

| ID  | Wild Type SARS-CoV-2 |                    |                     | V1=(RBD, N501Y) Alpha |                    |                     | V2 =(RBD, E484K, K417N, N501Y) Beta |                    |                     | V3 =(RBD, E484K, K417T, N501Y) Gamma |                    |                     | V4 =(RBD, L452R) Epsilon |                    |                     | V5=(RBD, E484Q, L452R) Kappa |                    |                     | V6=(RBD, L452R, T478K) Delta |                    |                     |
|-----|----------------------|--------------------|---------------------|-----------------------|--------------------|---------------------|-------------------------------------|--------------------|---------------------|--------------------------------------|--------------------|---------------------|--------------------------|--------------------|---------------------|------------------------------|--------------------|---------------------|------------------------------|--------------------|---------------------|
|     |                      |                    |                     |                       |                    |                     |                                     |                    |                     |                                      |                    |                     |                          |                    |                     |                              |                    |                     |                              |                    |                     |
|     | Baseline             | First Vaccine Dose | Second Vaccine Dose | Baseline              | First Vaccine Dose | Second Vaccine Dose | Baseline                            | First Vaccine Dose | Second Vaccine Dose | Baseline                             | First Vaccine Dose | Second Vaccine Dose | Baseline                 | First Vaccine Dose | Second Vaccine Dose | Baseline                     | First Vaccine Dose | Second Vaccine Dose | Baseline                     | First Vaccine Dose | Second Vaccine Dose |
| 511 | 81                   | 98                 | 97                  | 59                    | 98                 | 98                  | 41                                  | 96                 | 96                  | 27                                   | 96                 | 96                  | 56                       | 98                 | 98                  | 58                           | 97                 | 97                  | 62                           | 98                 | 98                  |
| 512 | 46                   | 87                 | 89                  | 25                    | 91                 | 88                  | 16                                  | 82                 | 80                  | 5                                    | 80                 | 78                  | 31                       | 90                 | 84                  | 19                           | 81                 | 76                  | 45                           | 76                 | 69                  |
| 218 | 72                   | 98                 | 97                  | 31                    | 98                 | 98                  | 26                                  | 96                 | 96                  | 6                                    | 98                 | 98                  | 31                       | 98                 | 98                  | 11                           | 97                 | 98                  | 45                           | 98                 | 98                  |
| 376 | 94                   | 98                 | 97                  | 63                    | 98                 | 98                  | 38                                  | 96                 | 96                  | 28                                   | 98                 | 98                  | 68                       | 98                 | 98                  | 63                           | 97                 | 97                  | 72                           | 98                 | 98                  |
| 367 | 92                   | 98                 | 97                  | 56                    | 98                 | 98                  | 40                                  | 97                 | 96                  | 38                                   | 98                 | 98                  | 66                       | 98                 | 98                  | 64                           | 97                 | 98                  | 76                           | 98                 | 98                  |
| 294 | 52                   | 97                 | 98                  | 23                    | 98                 | 98                  | 17                                  | 96                 | 96                  | 19                                   | 97                 | 97                  | 24                       | 98                 | 98                  | 11                           | 97                 | 97                  | 28                           | 98                 | 98                  |
| 384 | 87                   | 98                 | 98                  | 61                    | 98                 | 98                  | 37                                  | 96                 | 96                  | 18                                   | 98                 | 98                  | 57                       | 98                 | 98                  | 38                           | 97                 | 98                  | 69                           | 98                 | 98                  |
| 313 | 97                   | 99                 | 98                  | 87                    | 98                 | 98                  | 81                                  | 97                 | 96                  | 75                                   | 98                 | 98                  | 88                       | 98                 | 98                  | 87                           | 98                 | 98                  | 92                           | 98                 | 98                  |
| 382 | 72                   | 98                 | 97                  | 39                    | 98                 | 98                  | 18                                  | 96                 | 96                  | 16                                   | 98                 | 98                  | 36                       | 98                 | 98                  | 34                           | 98                 | 98                  | 42                           | 98                 | 98                  |
| 297 | 96                   | 97                 | 97                  | 94                    | 98                 | 98                  | 87                                  | 99                 | 97                  | 78                                   | 98                 | 98                  | 94                       | 98                 | 98                  | 92                           | 97                 | 98                  | 93                           | 98                 | 98                  |

POS ≥ 30% signal inhibition

|                                                   |                                                                                                                                        |
|---------------------------------------------------|----------------------------------------------------------------------------------------------------------------------------------------|
| V1=(RBD, N501Y, Avi & His tag)-HRP                | U1100GG280-1:Catalog No: Z03595-100; Name: SARS-CoV-2 Spike protein (RBD, N501Y, Avi & His tag)-HRP; Qty: 1; Size: 100ul               |
| V2 =(RBD, E484K, K417N, N501Y, Avi & His tag)-HRP | U1100GG280-2:Catalog No: Z03596-100; Name: SARS-CoV-2 Spike protein (RBD, E484K, K417N, N501Y, Avi & His tag)-HRP; Qty: 1; Size: 100ul |
| V3 =(RBD, E484K, K417T, N501Y, Avi & His Tag)-HRP | U1100GG280-3:Catalog No: Z03601-100; Name: SARS-CoV-2 Spike protein (RBD, E484K, K417T, N501Y, Avi & His Tag)-HRP; Qty: 1; Size: 100ul |
| V4 =(RBD, L452R, Avi & His Tag)-HRP               | U1100GG280-4:Catalog No: Z03605-100; Name: SARS-CoV-2 Spike protein (RBD, L452R, Avi & His Tag)-HRP; Qty: 1; Size: 100ul               |
| V5 =(RBD, E484Q, L452R, Avi & His Tag)-HRP        | U1100GG280-5:Catalog No: Z03608-100; Name: SARS-CoV-2 Spike protein (RBD, E484Q, L452R, Avi & His Tag)-HRP; Qty: 1; Size: 100ul        |
| V6 =(RBD, L452R, T478K, Avi & His Tag)-HRP        | U1100GG280-6Catalog No: Z03614-100; Name: SARS-CoV-2 Spike protein (RBD, L452R, T478K, Avi & His Tag)-HRP; Qty: 1; Size: 100ul         |
