# Supplementary material for: Limited Impact of Delta Variant’s Mutations on the Effectiveness of Neutralization Conferred by Natural Infection or COVID-19 Vaccines in a Latino Population
Source: MDPI journal article supplement (doi:10.3390/v13122405), 2021-11-30
Supplement: s1 [file s1]

Supplementary Table S4. Neutralization Data Against SARS-CoV-2 and Variants for Healthy Vaccinated Individuals

| ID  | WT SARS-CoV-2 |                    |                     | V1= (RBD, NS01Y) Alpha |                    |                     | V2 = (RBD, E484K, K417N, NS01Y) Beta |                    |                     | V3 = (RBD, E484K, K417T, NS01Y) Gamma |                    |                     | V4 = (RBD, L452R) Epsilon |                    |                     | V5= (RBD, E484Q, L452R) India |                    |                     | V6= (RBD, L452R, T478K) Delta |                    |                     |
|-----|---------------|--------------------|---------------------|------------------------|--------------------|---------------------|--------------------------------------|--------------------|---------------------|---------------------------------------|--------------------|---------------------|---------------------------|--------------------|---------------------|-------------------------------|--------------------|---------------------|-------------------------------|--------------------|---------------------|
|     | Baseline      | First Vaccine Dose | Second Vaccine Dose | Baseline               | First Vaccine Dose | Second Vaccine Dose | Baseline                             | First Vaccine Dose | Second Vaccine Dose | Baseline                              | First Vaccine Dose | Second Vaccine Dose | Baseline                  | First Vaccine Dose | Second Vaccine Dose | Baseline                      | First Vaccine Dose | Second Vaccine Dose | Baseline                      | First Vaccine Dose | Second Vaccine Dose |
| 479 | 10            | 46                 | 97                  | 0                      | 25                 | 97                  | 0                                    | 0                  | 87                  | 7                                     | 31                 | 89                  | 0                         | 33                 | 98                  | 0                             | 42                 | 97                  | 0                             | 43                 | 97                  |
| 112 | 19            | 96                 | 98                  | 0                      | 79                 | 98                  | 0                                    | 72                 | 96                  | 0                                     | 68                 | 97                  | 0                         | 87                 | 98                  | 0                             | 83                 | 97                  | 0                             | 91                 | 97                  |
| 2   | 10            | 46                 | 98                  | 3                      | 21                 | 95                  | 0                                    | 23                 | 90                  | 5                                     | 43                 | 90                  | 0                         | 29                 | 97                  | 0                             | 26                 | 95                  | 0                             | 28                 | 96                  |
| 3   | 19            | 49                 | 98                  | 2                      | 37                 | 94                  | 0                                    | 14                 | 86                  | 0                                     | 22                 | 83                  | 0                         | 50                 | 96                  | 0                             | 25                 | 96                  | 0                             | 45                 | 97                  |
| 243 | 22            | 76                 | 97                  | 0                      | 46                 | 96                  | 0                                    | 27                 | 89                  | 6                                     | 32                 | 90                  | 2                         | 42                 | 97                  | 0                             | 36                 | 96                  | 0                             | 56                 | 97                  |
| 258 | 20            | 50                 | 97                  | 0                      | 32                 | 94                  | 0                                    | 23                 | 73                  | 0                                     | 18                 | 81                  | 0                         | 20                 | 94                  | 0                             | 24                 | 93                  | 0                             | 37                 | 95                  |
| 119 | 21            | 29                 | 97                  | 0                      | 5                  | 86                  | 0                                    | 0                  | 61                  | 0                                     | 3                  | 63                  | 0                         | 8                  | 93                  | 0                             | 1                  | 91                  | 0                             | 17                 | 94                  |
| 190 | 23            | 28                 | 97                  | 0                      | 3                  | 96                  | 0                                    | 0                  | 88                  | 4                                     | 0                  | 86                  | 0                         | 0                  | 94                  | 0                             | 7                  | 94                  | 0                             | 4                  | 96                  |
| 453 | 12            | 76                 | 97                  | 1                      | 64                 | 93                  | 0                                    | 35                 | 83                  | 0                                     | 29                 | 84                  | 0                         | 65                 | 94                  | 0                             | 66                 | 94                  | 0                             | 78                 | 96                  |
| 6   | 15            | 65                 | 98                  | 5                      | 67                 | 96                  | 1                                    | 45                 | 88                  | 1                                     | 31                 | 78                  | 0                         | 36                 | 91                  | 0                             | 41                 | 91                  | 0                             | 58                 | 94                  |
| 383 | 4             | 71                 | 98                  | 2                      | 59                 | 96                  | 0                                    | 44                 | 90                  | 4                                     | 51                 | 91                  | 0                         | 44                 | 97                  | 0                             | 58                 | 96                  | 0                             | 63                 | 97                  |
| 450 | 4             | 70                 | 95                  | 0                      | 57                 | 84                  | 1                                    | 37                 | 75                  | 0                                     | 39                 | 72                  | 8                         | 40                 | 84                  | 0                             | 38                 | 82                  | 0                             | 53                 | 89                  |
| 110 | 18            | 44                 | 97                  | 4                      | 36                 | 92                  | 0                                    | 29                 | 89                  | 2                                     | 15                 | 88                  | 0                         | 27                 | 92                  | 0                             | 28                 | 92                  | 0                             | 38                 | 94                  |
| 480 | 4             | 70                 | 95                  | 0                      | 25                 | 95                  | 11                                   | 22                 | 82                  | 0                                     | 25                 | 81                  | 0                         | 18                 | 95                  | 2                             | 27                 | 94                  | 0                             | 36                 | 96                  |
| 10  | 24            | 61                 | 97                  | 0                      | 40                 | 96                  | 0                                    | 19                 | 89                  | 0                                     | 16                 | 85                  | 1                         | 33                 | 96                  | 0                             | 27                 | 96                  | 0                             | 37                 | 97                  |
| 116 | 0             | 66                 | 97                  | 0                      | 46                 | 97                  | 0                                    | 39                 | 89                  | 0                                     | 37                 | 89                  | 0                         | 46                 | 97                  | 5                             | 40                 | 96                  | 0                             | 50                 | 97                  |
| 380 | 25            | 61                 | 97                  | 0                      | 30                 | 94                  | 0                                    | 49                 | 88                  | 3                                     | 43                 | 84                  | 0                         | 50                 | 95                  | 1                             | 39                 | 95                  | 0                             | 49                 | 96                  |
| 8   | 28            | 70                 | 97                  | 2                      | 46                 | 92                  | 0                                    | 44                 | 87                  | 0                                     | 39                 | 85                  | 6                         | 37                 | 95                  | 0                             | 28                 | 95                  | 0                             | 46                 | 96                  |
| 117 | 22            | 55                 | 97                  | 0                      | 21                 | 89                  | 0                                    | 31                 | 86                  | 0                                     | 18                 | 78                  | 0                         | 36                 | 95                  | 0                             | 45                 | 95                  | 6                             | 41                 | 96                  |
| 254 | 18            | 57                 | 98                  | 2                      | 30                 | 96                  | 0                                    | 28                 | 90                  | 0                                     | 32                 | 89                  | 13                        | 45                 | 98                  | 0                             | 37                 | 97                  | 0                             | 47                 | 97                  |
| 513 | 17            | 79                 | 97                  | 5                      | 65                 | 98                  | 0                                    | 64                 | 97                  | 2                                     | 42                 | 97                  | 17                        | 69                 | 98                  | 1                             | 69                 | 98                  | 0                             | 73                 | 98                  |

POS ≥30% signal inhibition

|                                                    |                                                                                                                                        |
|----------------------------------------------------|----------------------------------------------------------------------------------------------------------------------------------------|
| V1= (RBD, NS01Y, Avi & His Tag)-HRP                | U1100GG280-1:Catalog No: Z03595-100; Name: SARS-CoV-2 Spike protein (RBD, NS01Y, Avi & His tag)-HRP; Qty: 1; Size: 100ul               |
| V2 = (RBD, E484K, K417N, NS01Y, Avi & His tag)-HRP | U1100GG280-2:Catalog No: Z03596-100; Name: SARS-CoV-2 Spike protein (RBD, E484K, K417N, NS01Y, Avi & His tag)-HRP; Qty: 1; Size: 100ul |
| V3 = (RBD, E484K, K417T, NS01Y, Avi & His Tag)-HRP | U1100GG280-3:Catalog No: Z03601-100; Name: SARS-CoV-2 Spike protein (RBD, E484K, K417T, NS01Y, Avi & His Tag)-HRP; Qty: 1; Size: 100ul |
| V4 = (RBD, L452R, Avi & His Tag)-HRP               | U1100GG280-4:Catalog No: Z03605-100; Name: SARS-CoV-2 Spike protein (RBD, L452R, Avi & His Tag)-HRP; Qty: 1; Size: 100ul               |
| V5 = (RBD, E484Q, L452R, Avi & His Tag)-HRP        | U1100GG280-5:Catalog No: Z03608-100; Name: SARS-CoV-2 Spike protein (RBD, E484Q, L452R, Avi & His Tag)-HRP; Qty: 1; Size: 100ul        |
| V6 = (RBD, L452R, T478K, Avi & His Tag)-HRP        | U1100GG280-6:Catalog No: Z03614-100; Name: SARS-CoV-2 Spike protein (RBD, L452R, T478K, Avi & His Tag)-HRP; Qty: 1; Size: 100ul        |
